# Supplementary material
Source: ML conference proceedings conference paper supplement (https://openreview.net/forum?id=HcUdtvUoqx5)

# **a Elicitation Error - FairME**

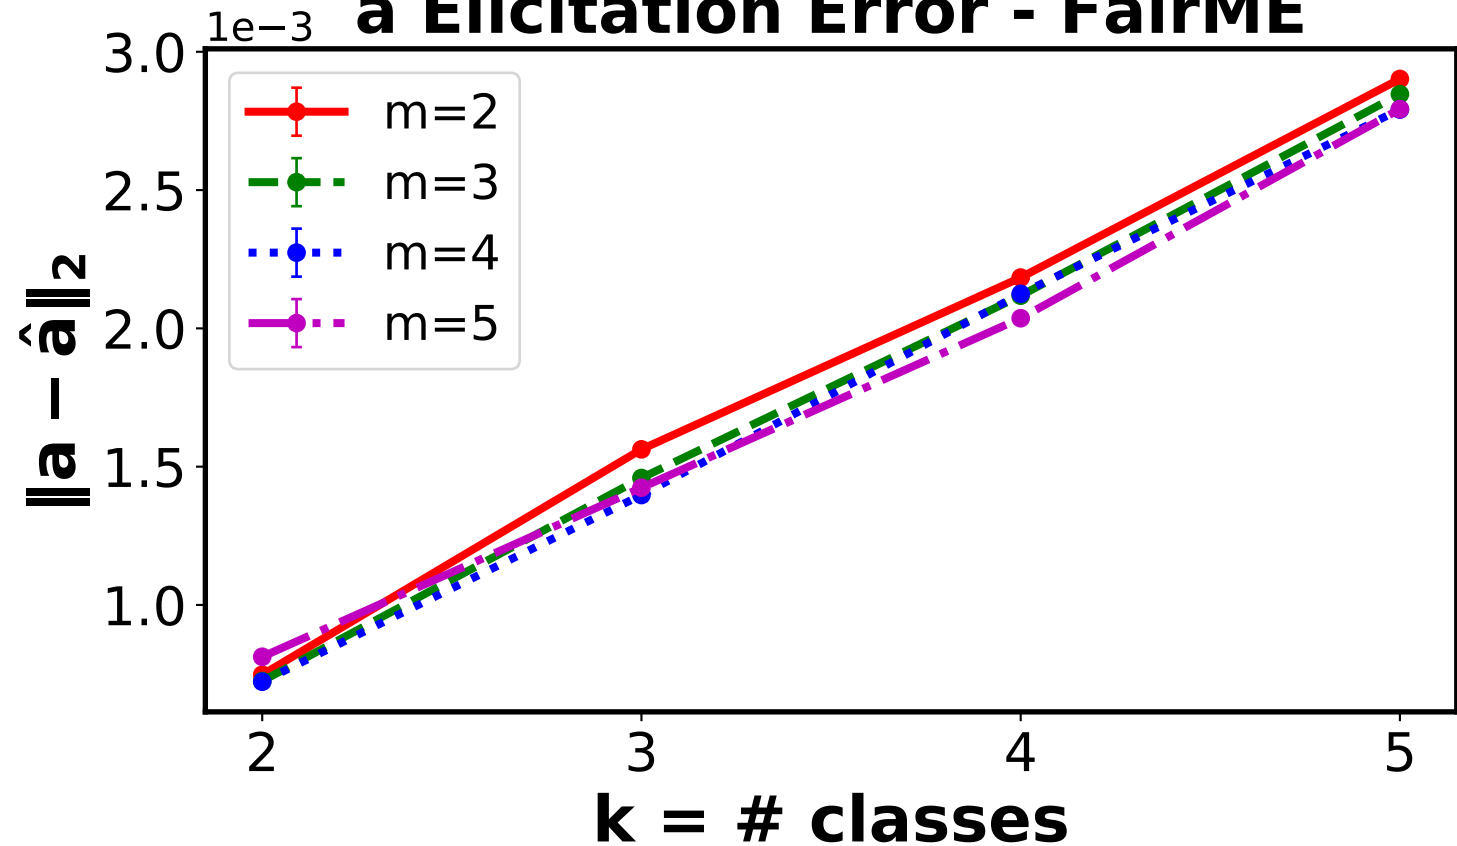

Supplement: supplementary_material [file attachment]

# B Elicitation Error - FairME

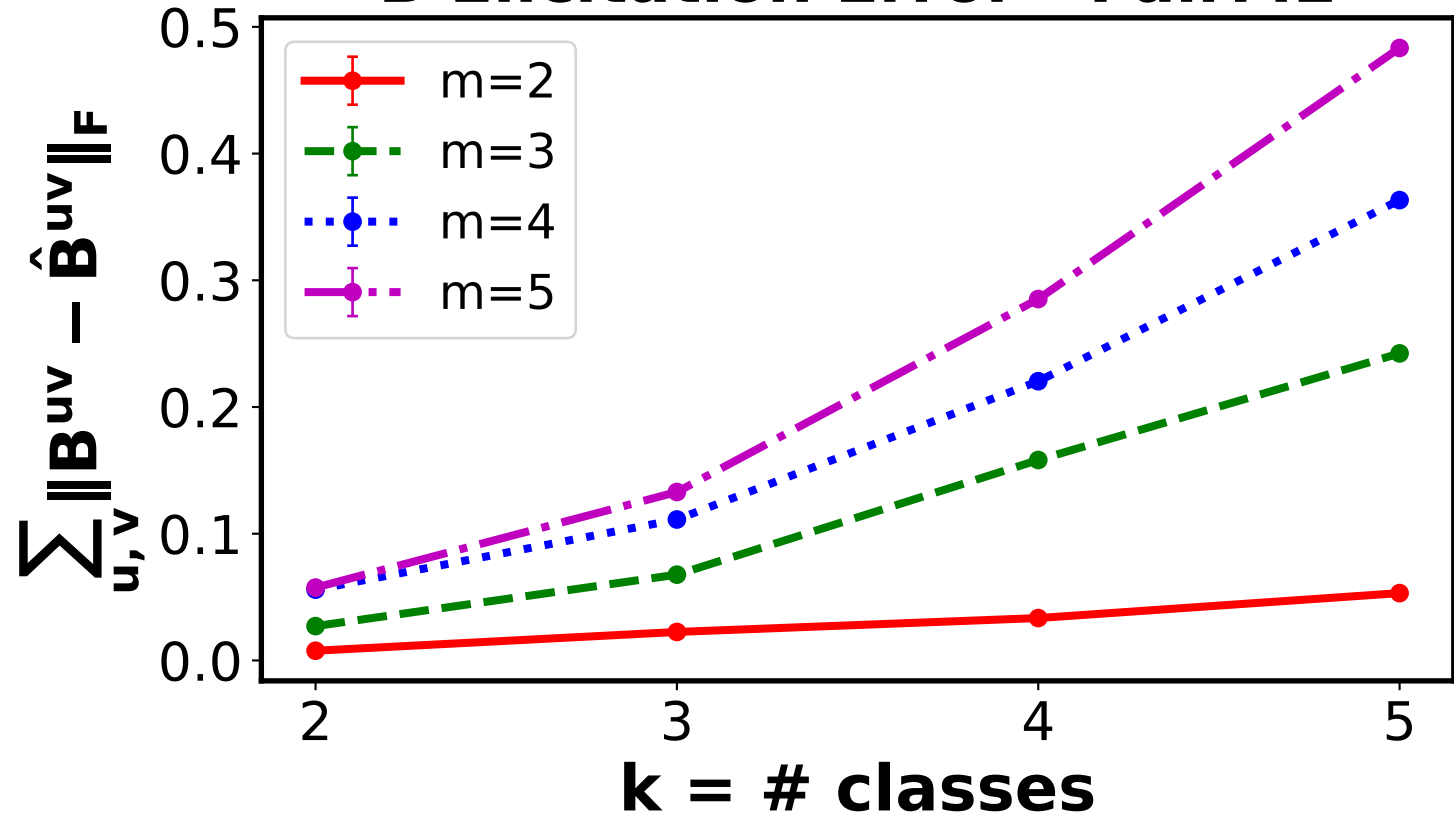

Supplement: supplementary_material [file attachment]

# a Baseline Error

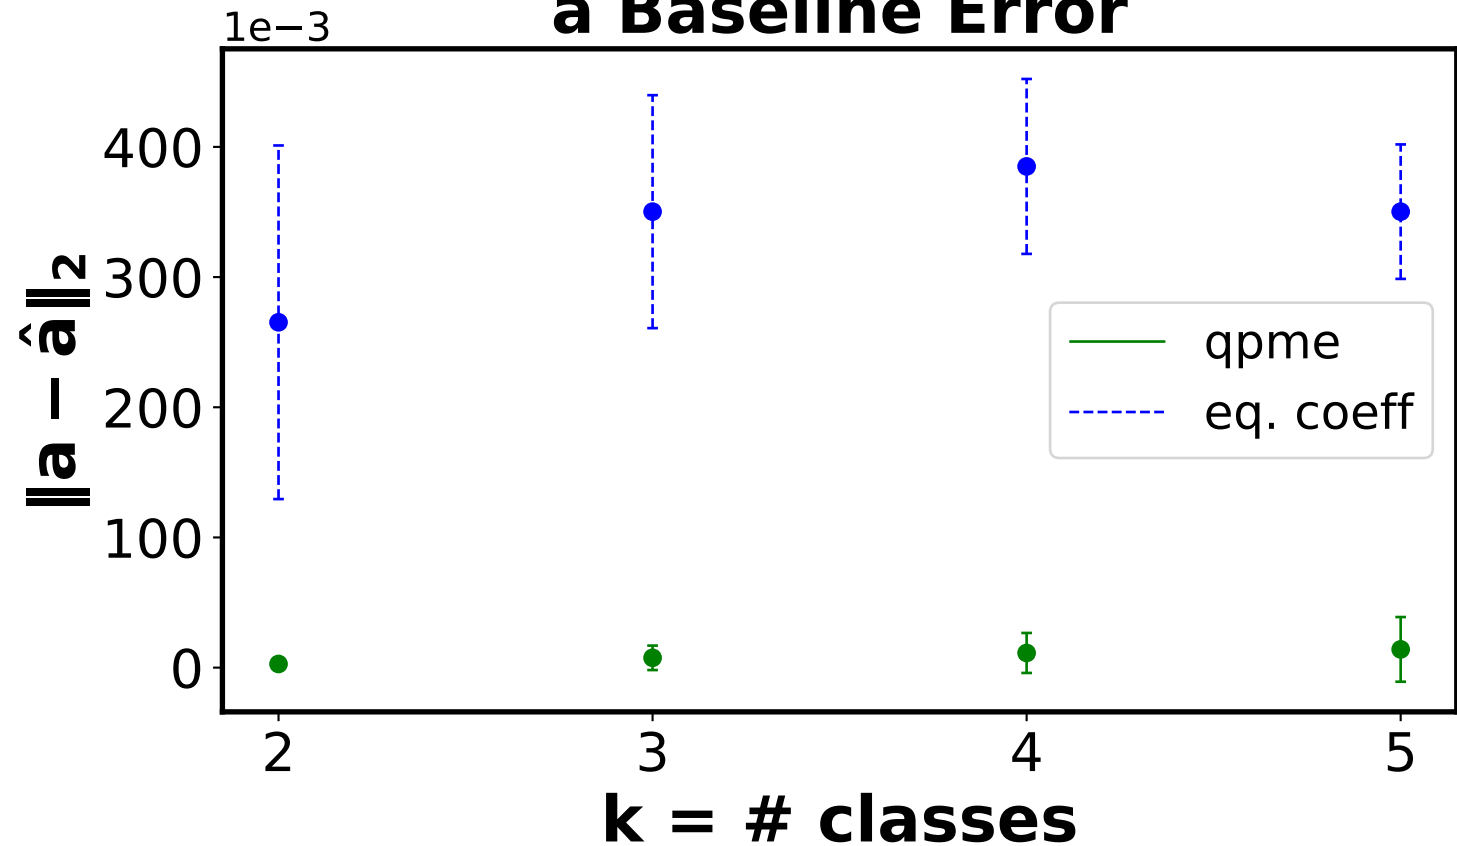

Supplement: supplementary_material [file attachment]

# $\lambda$ Elicitation Error - FairME

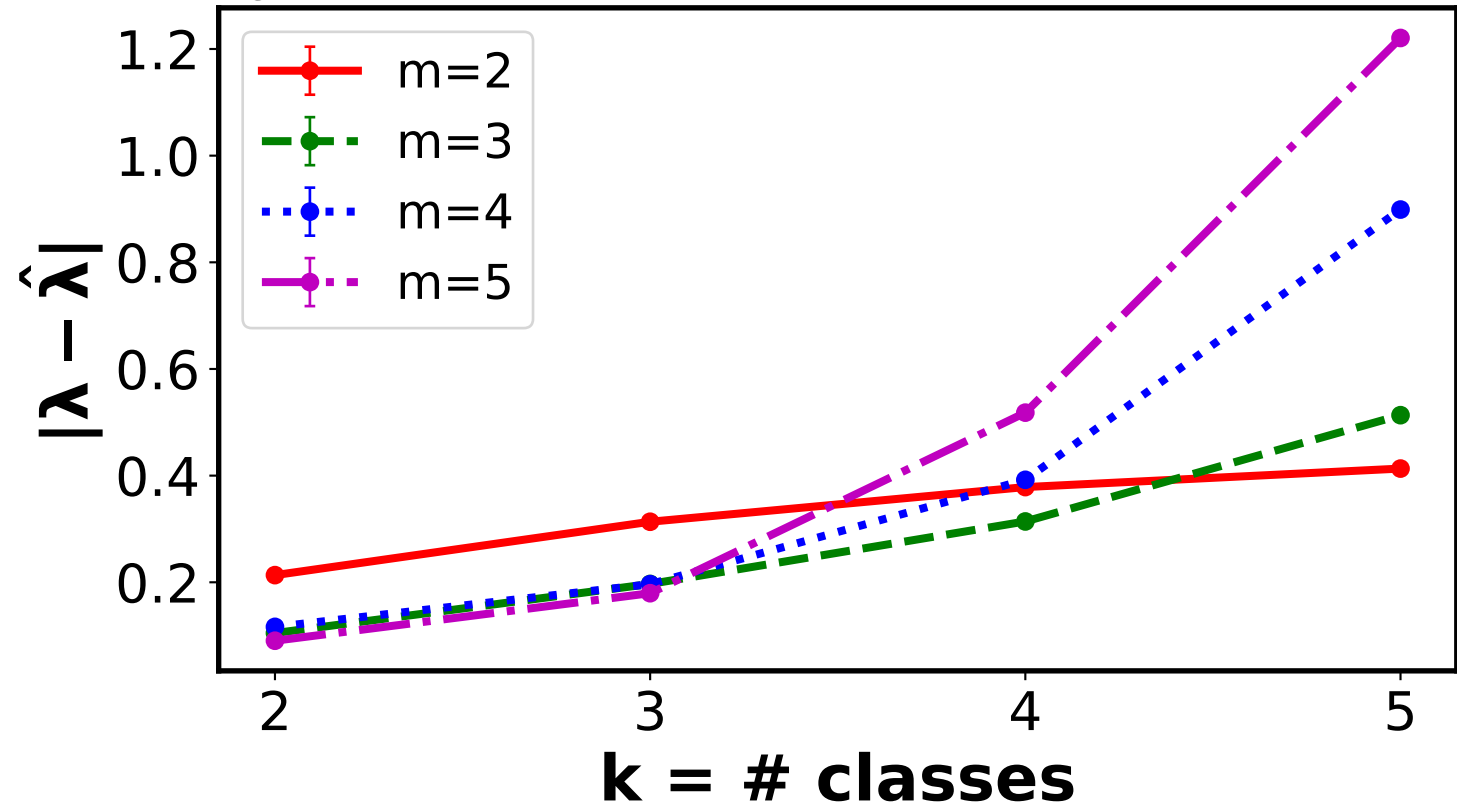

Supplement: supplementary_material [file attachment]

# B Elicitation Error - QPME

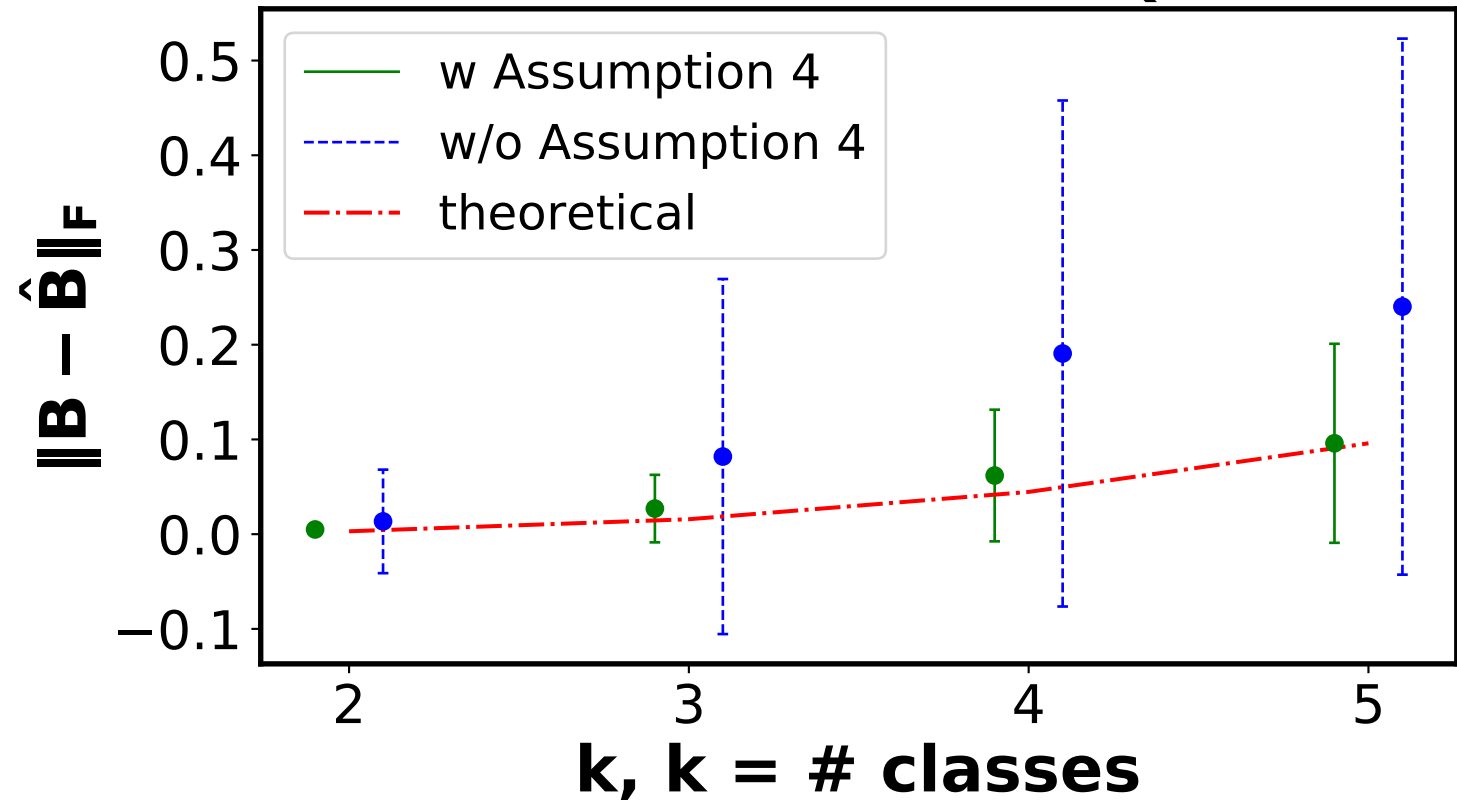

Supplement: supplementary_material [file attachment]

# B Baseline Error

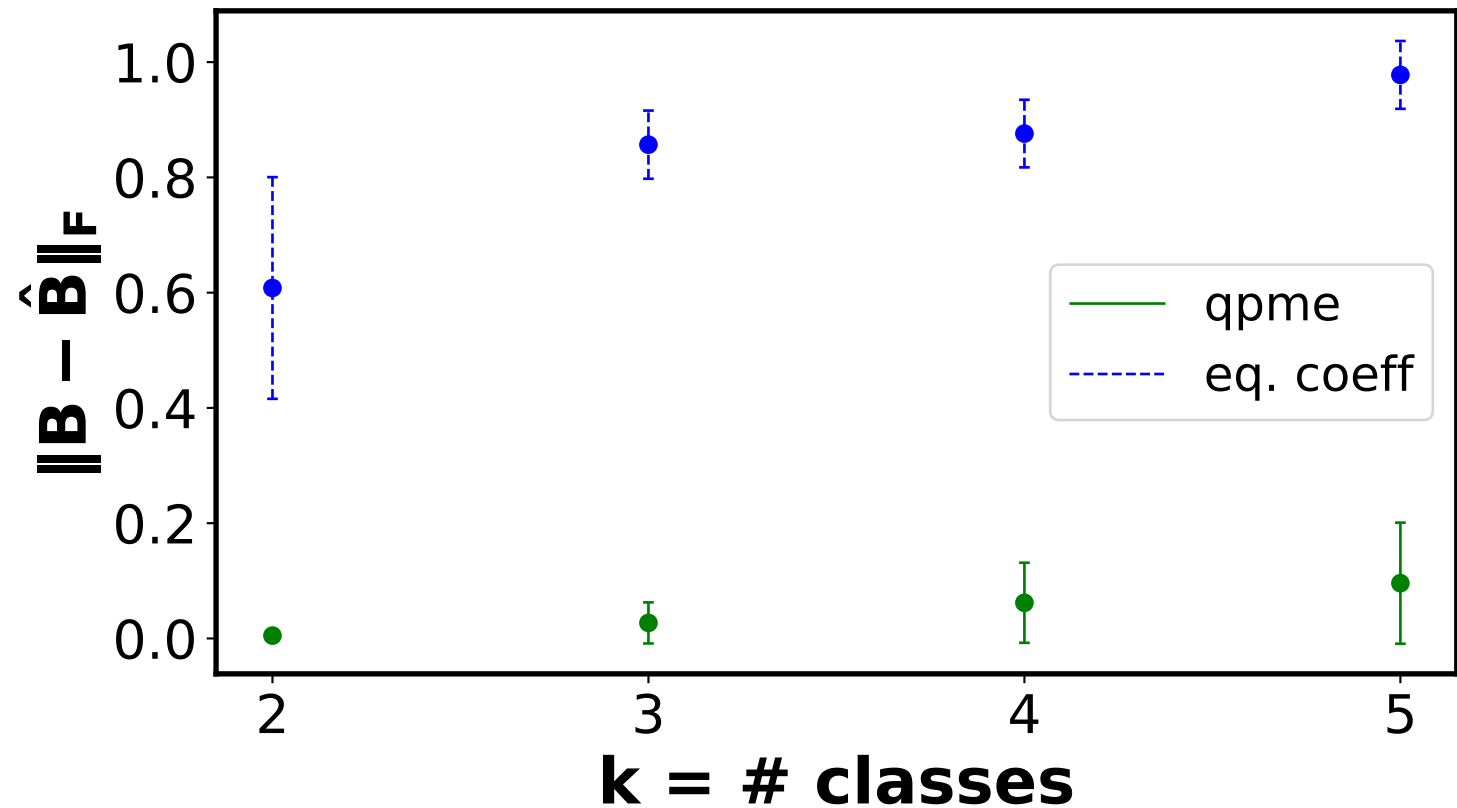

Supplement: supplementary_material [file attachment]

# Elicitation Error in B

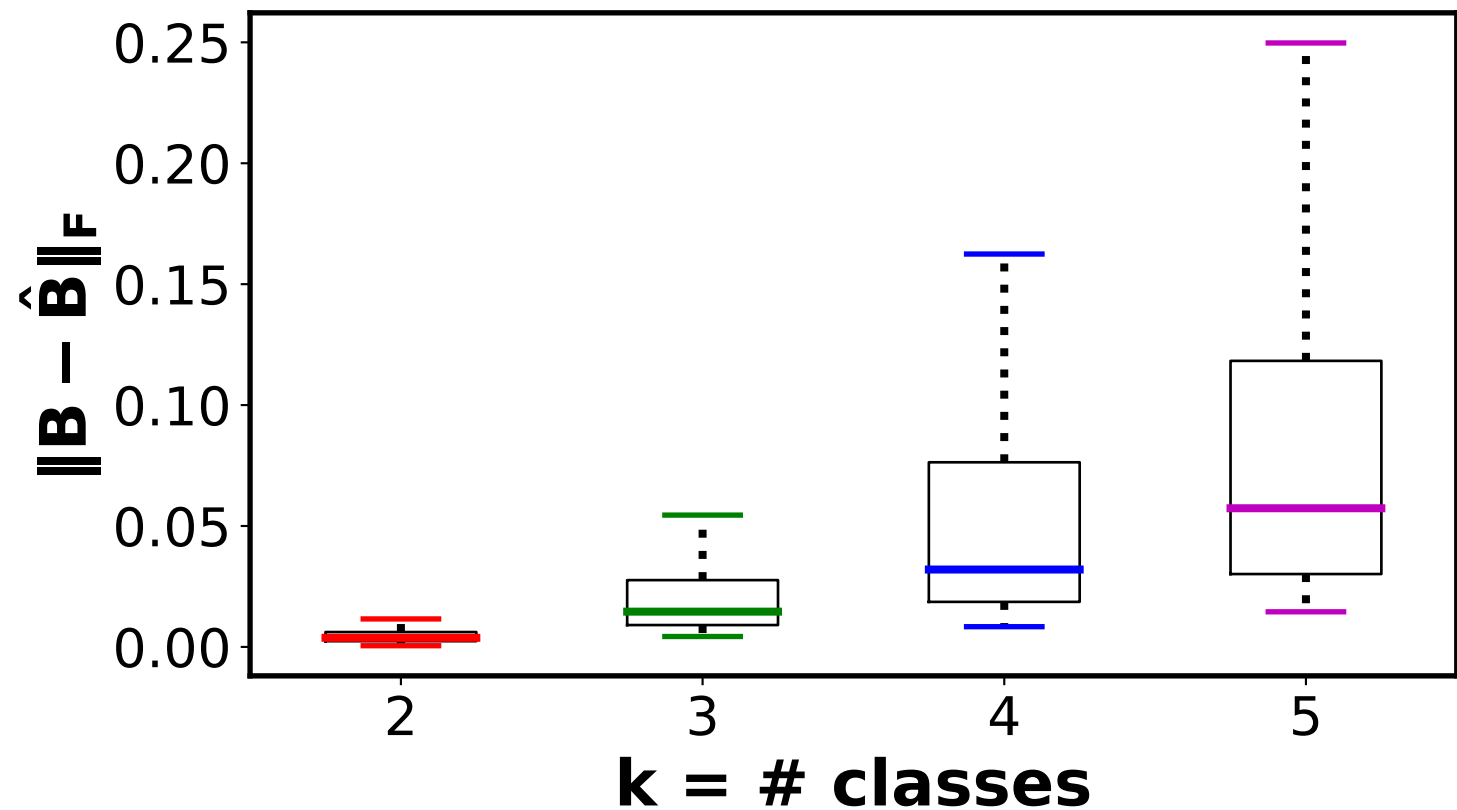

Supplement: supplementary_material [file attachment]

# Elicitation Error in a

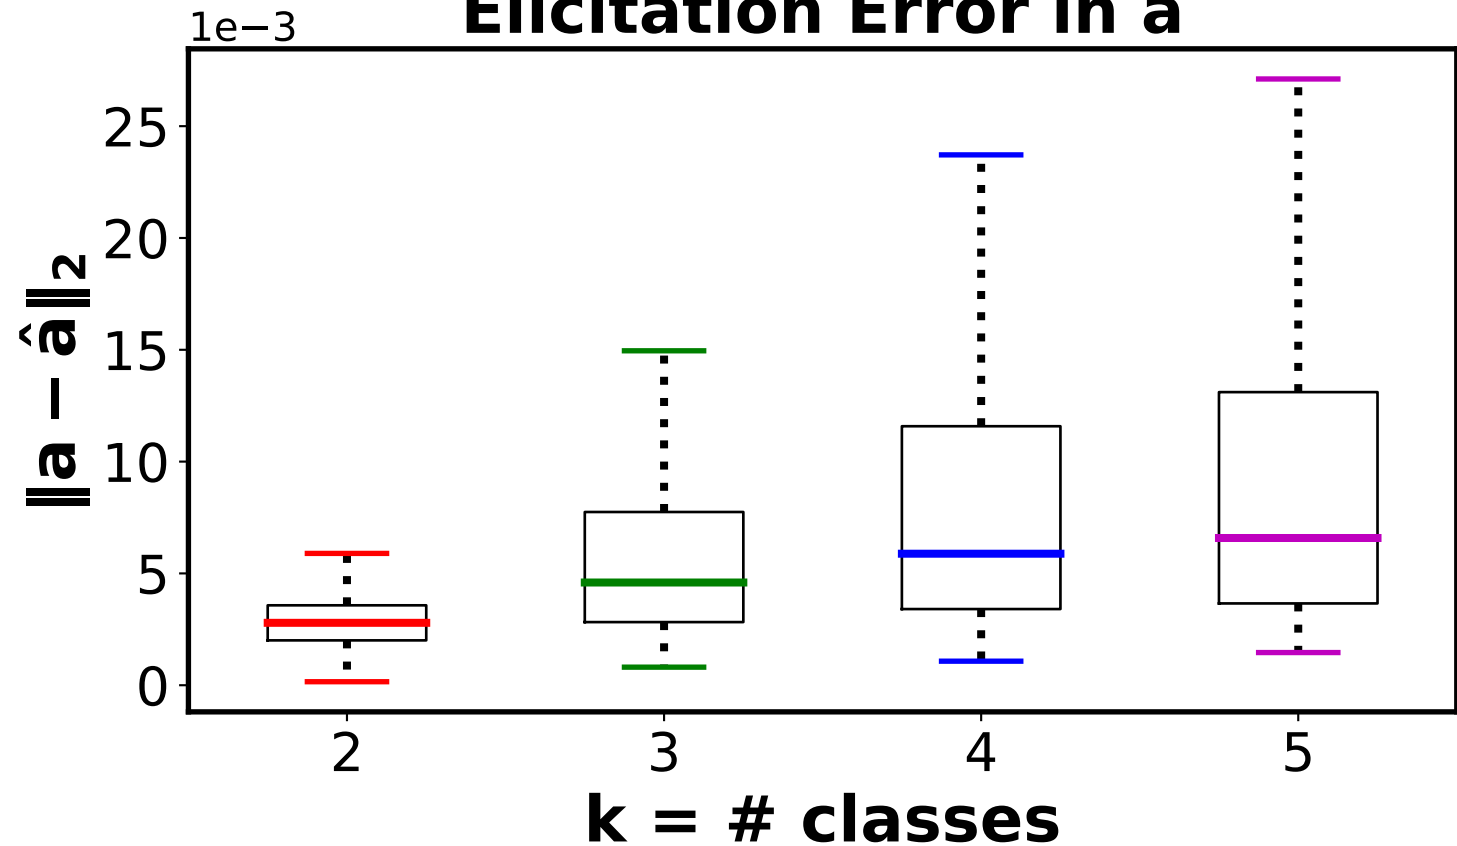

Supplement: supplementary_material [file attachment]

# a Elicitation Error - QPME

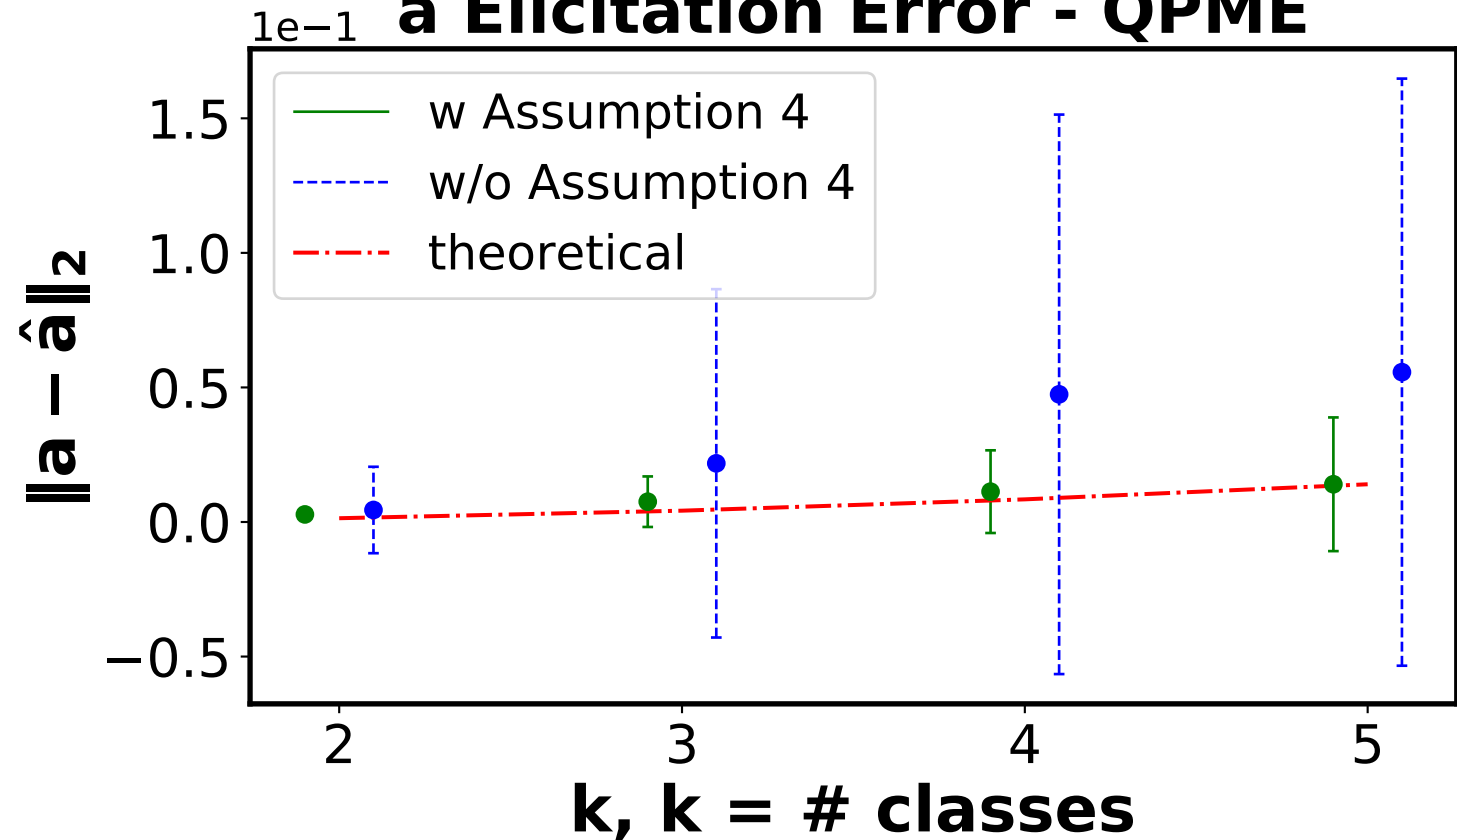

Supplement: supplementary_material [file attachment]
